# Supplementary material
Source: PubMed Central journal article supplement (PMC7493020)
Supplement: NIHMS1622410-supplement-Supplementary_Material.pdf [file NIHMS1622410-supplement-Supplementary_Material.pdf]

## Supplemental Table 1

### Experimental Results/Details of Chronically Cuffed Cervical Vagus Nerve on Rats

| Animal Name | H&E Histology | Visual Inspection *  | CNAP Detected in Stimulation? | FG Transport to Medulla RV (not cuffed) | FG Transport to Medulla LV (cuffed) ** | Cytokine Analysis ***      | Days Implanted |
|-------------|---------------|----------------------|-------------------------------|-----------------------------------------|----------------------------------------|----------------------------|----------------|
| eRx62       | Not observed  | N/A (not cuffed)     | N/A (control)                 | N/A (control)                           | N/A (control)                          | <i>Control (no device)</i> | N/A            |
| eRx63       | Not observed  | N/A (not cuffed)     | N/A (control)                 | N/A (control)                           | N/A (control)                          | Control (no device/LPS)    | N/A            |
| eRx104      | Not observed  | N/A (not cuffed)     | N/A (dummy device)            | Expected transport                      | Expected transport                     | Control (dummy device)     | 22             |
| eRx105      | Not observed  | N/A (not cuffed)     | N/A (dummy device)            | Expected transport                      | Expected transport                     | Control (dummy device)     | 23             |
| eRx106      | Not observed  | N/A (not cuffed)     | N/A (dummy device)            | Expected transport                      | Expected transport                     | Control (dummy device)     | 23             |
| eRx110      | Not observed  | N/A (not cuffed)     | N/A (dummy headcap)           | Expected transport                      | Expected transport                     | Control (dummy device)     | 21             |
| eRx114      | Not observed  | N/A (not cuffed)     | N/A (dummy headcap)           | Expected transport                      | Expected transport                     | Control (dummy device)     | 17             |
| eRx115      | Not observed  | N/A (not cuffed)     | N/A (dummy headcap)           | Expected transport                      | Expected transport                     | Control (dummy, no LPS)    | 17             |
| eRx127      | Normal        | Moderate migration   | N/A (no metal in cuff)        | Expected transport                      | Expected transport                     | NA (no blood collection)   | 32             |
| eRx128      | Normal        | Severe migration     | N/A (no metal in cuff)        | Expected transport                      | Complete suppression                   | NA (no blood collection)   | 32             |
| eRx132      | Normal        | Severe migration     | N/A (no metal in cuff)        | Expected transport                      | Complete suppression                   | Control (no metal in cuff) | 38             |
| eRx137      | Normal        | Moderate migration   | N/A (no metal in cuff)        | Expected transport                      | Complete suppression                   | Control (no metal in cuff) | 30             |
| eRx138      | Normal        | Severe migration     | N/A (no metal in cuff)        | Expected transport                      | Complete suppression                   | Control (no metal in cuff) | 30             |
| 9909        | Not observed  | Moderate migration   | N/A (not powered)             | Expected transport                      | Complete suppression                   | Control (no stimulation)   | 71             |
| 9932        | Not observed  | Severe migration     | N/A (not powered)             | Expected transport                      | Complete suppression                   | Control (no stimulation)   | 42             |
| eRx75       | Not observed  | Severe migration     | N/A (not powered)             | Expected transport                      | Heavy suppression                      | Control (no stimulation)   | 13             |
| eRx66       | Not observed  | not observed         | No detection / bad signal     | Expected transport                      | Complete suppression                   | NA (no blood collection)   | 45             |
| 9915        | Not observed  | Severe migration     | Possible CNAP / ambiguous     | Expected transport                      | Complete suppression                   | Stimulated                 | 57             |
| eRx61       | Not observed  | not observed         | No detection / bad signal     | Expected transport                      | Complete suppression                   | Stimulated                 | 62             |
| eRx80       | Not observed  | not observed         | No detection / bad signal     | Expected transport                      | Complete suppression                   | Stimulated                 | 37             |
| eRx83       | Not observed  | not observed         | No detection / bad signal     | Expected transport                      | Complete suppression                   | Stimulated                 | 29             |
| eRx88       | Not observed  | not observed         | No detection / bad signal     | Expected transport                      | Complete suppression                   | Stimulated                 | 21             |
| eRx111      | Not observed  | Severe migration     | No detection / no recording   | Expected transport                      | Complete suppression                   | Stimulated                 | 18             |
| eRx113      | Not observed  | not observed         | No detection / no recording   | Expected transport                      | Complete suppression                   | Stimulated                 | 18             |
| eRx64       | Not observed  | not observed         | Possible CNAP / ambiguous     | Expected transport                      | Complete suppression                   | Stimulated                 | 51             |
| 9937        | Not observed  | Moderate migration   | Possible CNAP / ambiguous     | Expected transport                      | Complete suppression                   | Stimulated                 | 38             |
| eRx53       | Not observed  | not observed         | Possible CNAP / ambiguous     | Expected transport                      | Complete suppression                   | Stimulated                 | 48             |
| eRx55       | Not observed  | not observed         | Possible CNAP / ambiguous     | Expected transport                      | Complete suppression                   | Stimulated                 | 44             |
| eRx68       | Not observed  | Moderate migration   | No detection / bad signal     | Expected transport                      | Complete suppression                   | Stimulated                 | 21             |
| eRx81       | Not observed  | Moderate migration   | Possible CNAP / ambiguous     | Expected transport                      | Complete suppression                   | Stimulated                 | 37             |
| eRx118      | Not observed  | Moderate migration   | No detection / no recording   | Expected transport                      | Complete suppression                   | Stimulated                 | 14             |
| eRx102      | Not observed  | not observed         | Conclusive CNAP               | Expected transport                      | Complete suppression                   | Stimulated                 | 23             |
| eRx103      | Not observed  | Mild or no migration | Conclusive CNAP               | Expected transport                      | Light suppression                      | Control (no LPS)           | 22             |
| eRx108      | Not observed  | not observed         | Conclusive CNAP               | Expected transport                      | Complete suppression                   | Stimulated                 | 21             |
| eRx109      | Not observed  | not observed         | Conclusive CNAP               | Expected transport                      | Complete suppression                   | Stimulated                 | 21             |
| eRx71       | Not observed  | Mild or no migration | No detection / bad signal     | Expected transport                      | Complete suppression                   | Stimulated                 | 44             |
| eRx72       | Not observed  | Mild or no migration | Possible CNAP / ambiguous     | Expected transport                      | Complete suppression                   | Stimulated                 | 13             |
| eRx116      | Not observed  | Mild or no migration | Possible CNAP / ambiguous     | Expected transport                      | Heavy suppression                      | Stimulated                 | 17             |
| eRx119      | Not observed  | Mild or no migration | No detection / bad signal     | Expected transport                      | Moderate suppression                   | Stimulated                 | 14             |
| eRx141      | Normal        | Mild or no migration | Possible CNAP / ambiguous     | Expected transport                      | Complete suppression                   | Stimulated                 | 27             |
| eRx142      | Normal        | Mild or no migration | Conclusive CNAP               | Expected transport                      | Complete suppression                   | Stimulated                 | 26             |
| eRx143      | Normal        | Mild or no migration | Possible CNAP / ambiguous     | Expected transport                      | Complete suppression                   | Stimulated                 | 26             |
| eRx144      | Not observed  | Mild or no migration | Conclusive CNAP               | Expected transport                      | Complete suppression                   | Stimulated                 | 36             |
| eRx147      | Not observed  | Mild or no migration | Conclusive CNAP               | Expected transport                      | Complete suppression                   | Stimulated                 | 36             |
| eRx148      | Not observed  | Mild or no migration | Conclusive CNAP               | Expected transport                      | Complete suppression                   | Stimulated                 | 36             |
| eRx150      | Not observed  | Mild or no migration | Possible CNAP / ambiguous     | Expected transport                      | Complete suppression                   | Stimulated                 | 34             |
| eRx152      | Not observed  | Mild or no migration | Conclusive CNAP               | Expected transport                      | Complete suppression                   | Control (no LPS)           | 34             |

Table illustrates results from chronic testing for 47 rats: Blue = a good or expected result; Red = a bad or unexpected result; Yellow = indeterminant result; White = not tested or not applicable in that animal.

\* “Moderate” migration was defined as an electrode(s) that was generally in the correct location but had moved laterally ~1mm or less and/or appeared to have rotated ~30 degrees or less. The nerve still appeared to be intact and encompassed in the cuff electrode. “Severe” was defined as an electrode(s) that had obvious migrations of >1mm laterally, rotation of >30 degrees, and/or signs of significant pulling or tearing of the encompassed vagus nerve.

\*\* “Heavy” suppression was quantified as having no more than 15 illuminated cells in any given medulla section. “Moderate” suppression was quantified as having more than 15 illuminated cells in any given medulla section, but still had a majority of cells suppressed. “Light” suppression was quantified as having observable cell suppression, but the majority of cells illuminated.

\*\*\* Highlighted (green) and italicized items indicate animals that were included in our cytokine analyses.

## Supplemental Table 2

Experimental Results/Details of Chronically Cuffed Cervical Vagus Nerve on Rats Used for Gastric Emptying Experiments

| Animal Name | Control Scan     | Stimulation Scan          | Necropsy Nerve Inspection * | FG Transport to Medulla RV (not cuffed) | FG Transport to Medulla LV (cuffed) ** | Medulla FG Brightness | Nodose FG Brightness | Days Implanted |
|-------------|------------------|---------------------------|-----------------------------|-----------------------------------------|----------------------------------------|-----------------------|----------------------|----------------|
| eRx157 ***  | Good Results     | N/A                       | N/A                         | N/A                                     | N/A                                    | N/A                   | N/A                  | 23             |
| eRx159      | Good Results     | Good Results              | Mild or no migration        | Expected Transport                      | Heavy Suppression                      | Bright                | Bright               | 34             |
| eRx160      | Good Results     | Total Apnea, Stopped Stim | Mild or no migration        | Expected Transport                      | Moderate Suppression                   | Bright                | Dull But Present     | 35             |
| eRx161      | Good Results     | Apnea During Stim         | Mild or no migration        | Expected Transport                      | Complete Suppression                   | Bright                | Bright               | 47             |
| eRx162      | Good Results     | Good Results              | Mild or no migration        | Expected Transport                      | Moderate Suppression                   | Bright                | Bright               | 46             |
| eRx163      | Breathing Issues | Apnea During Stim         | Moderate Migration/Pulling  | Expected Transport                      | Complete Suppression                   | Dull But Present      | Dull But Present     | 48             |

Table illustrates results from chronic testing for 6 rats: Blue = a good or expected result; Red = a bad or unexpected result; Yellow = indeterminant result; White = not tested or not applicable in that animal.

\* “Moderate” migration was defined as an electrode(s) that was generally in the correct location but had moved laterally ~1mm or less and/or appeared to have rotated ~30 degrees or less. The nerve still appeared to be intact and encompassed in the cuff electrode.

\*\* “Heavy” suppression was quantified as having no more than 15 illuminated cells in any given medulla section. “Moderate” suppression was quantified as having more than 15 illuminated cells in any given medulla section, but still had a majority of cells suppressed.

\*\*\* eRx157 knocked its headcap off before the scheduled stimulation scan and was euthanized.

### Supplemental Table 3

#### Overview of 17 Previous Studies Using Chronic Vagus Nerve Cuffing

| Topic                               |                                    |              | Animals             |          |                  | Cuffs                     |                     |                              |                                                                                             | Tests Done    |                 |                 |                       | Reference                     |
|-------------------------------------|------------------------------------|--------------|---------------------|----------|------------------|---------------------------|---------------------|------------------------------|---------------------------------------------------------------------------------------------|---------------|-----------------|-----------------|-----------------------|-------------------------------|
| Biological Topic                    | Fiber Target (Afferent / Efferent) | Nerve Cuffed | Breed (Rat)         | Weight   | Sample Size      | Cuff Type                 | Cuff Inner Diameter | Duration Cuffed              | Cuffing Technique                                                                           | CNAP Recorded | Nerve Histology | Fluorogold Used | Inflammation Measured | Author                        |
| Seizure suppression                 | Afferent                           | Left         | Sprague-Dawley      | --       | 34               | --                        | --                  | 4 days                       | Nerve isolated (assumed), cuffed                                                            | No            | No              | No              | No                    | Krahl et al. (2001) [22]      |
| Anti-depression                     | Afferent                           | Left         | Sprague-Dawley      | 275g+    | 5-6 per group    | Cyberonics helical        | 1mm (assumed)       | 2 days + (1 hour to 90 days) | Cuffs wrapped around nerve & carotid; leads suture to muscle                                | No            | No              | No              | No                    | Dorr et al. (2006) [23]       |
| Tremor suppression                  | Afferent                           | Left         | Long-Evans          | 300-350g | 7                | Cyberonics helical        | 1mm                 | 4+ days                      | Cuffs wrapped around nerve & carotid                                                        | No            | No              | No              | No                    | Handforth et al. (2001) [24]  |
| Hippocampal neuronal plasticity     | Afferent                           | Left         | Sprague-Dawley      | 250-300g | 6 per group      | Cyberonics helical        | --                  | 2 days + 1 month             | Cuffs wrapped around nerve & carotid                                                        | No            | No (Brain)      | No              | No                    | Biggio et al. (2009) [25]     |
| Neuroprotective effects in brain    | Afferent                           | Left         | Wistar              | Variable | 24               | Cyberonics helical        | --                  | 13 weeks                     | Cuffs wrapped around nerve (carotid unspecified)                                            | No            | No (Brain)      | No              | Yes (Plasma, brain)   | Chunchai et al. (2016) [26]   |
| Brain biomarkers / anti-depression  | Afferent                           | Left         | Sprague-Dawley      | 250-350g | 29               | Cyberonics helical        | --                  | 4 weeks                      | References Dorr et al.                                                                      | No            | No              | No              | No                    | Cunningham et al. (2008) [15] |
| Anti-depression                     | Afferent                           | Left         | Sprague-Dawley      | 250-300g | 45               | Self-sizing spiral cuff   | 1mm                 | 8 weeks                      | Nerve isolated; wrapped with cuff                                                           | No            | No (Brain)      | No              | No                    | Grimonprez et al. (2015) [27] |
| Body weight / fat mass              | Both Possible                      | Left         | Sprague-Dawley      | 250-300g | 13 max per group | Cyberonics helical        | --                  | 2 days + 4 weeks             | Cuffs wrapped around nerve (carotid unspecified)                                            | No            | No              | No              | No                    | Banni et al. (2012) [72]      |
| Pain memory                         | Afferent                           | Left         | Sprague-Dawley      | 300-350g | 8 max per group  | PVS sheath                | 1 mm                | 16 days                      | Nerve isolated; pvc around nerve; leads sutured to cleidomastoid                            | No            | No              | No              | No                    | Zhang et al. (2013) [28]      |
| Fear / memory conditioning          | Afferent                           | Left         | Sprague-Dawley      | 250-300g | 40               | Silicone tube             | 1 mm                | 13 days                      | Nerve isolated; cuffed                                                                      | No            | No              | No              | No                    | Pena et al. (2014) [29]       |
| Enhanced memory                     | Both                               | Left         | Long-Evans          | 350-450g | 64               | PVC sheath                | 1 mm                | ~3 days                      | Nerve isolated; pvc around nerve; leads sutured to cleidomastoid; bone wax inside cuff      | Yes           | No              | No              | No                    | Clark et al. (1998) [14]      |
| Bowel Inflammation                  | Both                               | Left         | Sprague-Dawley      | --       | 48               | Cyberonics helical        | --                  | 17 days                      | Cuffs wrapped around nerve & carotid                                                        | No            | No (Colon)      | No              | Yes (Colon)           | Meregnani et al. (2011) [34]  |
| Cardiac remodeling (heart failure)  | Both                               | Left         | Sprague-Dawley      | --       | 63               | Silicone tube             | 0.75 mm             | 14 weeks                     | Nerve isolated; cuffed/sutured shut; strain relief cuff placed around nerve cuff and artery | No            | No              | No              | No                    | Agarwal et al. (2016) [30]    |
| Hypertension, Cardiovascular damage | Both                               | Right        | Rat (not specified) | --       | 24               | Wire with Kwik-Sil        | wrapped wire        | 4-5 weeks                    | Nerve isolated; wire wrapped around; Kwik-Sil encapsulated                                  | No            | No              | No              | Yes (Serum)           | Chapleau et al. (2016) [31]   |
| Negative heart impacts              | Both                               | Right        | Sprague-Dawley      | 250-300g | 9                | Cyberonics helical        | 1.5 mm              | 10 weeks                     | Cuffs wrapped around nerve & carotid                                                        | No            | No              | No              | No                    | Lee et al. (2016) [32]        |
| Artery pressure / heart rate        | Both                               | Right        | Sprague-Dawley      | 250-350g | --               | Silicone tube             | 0.5 mm              | up to 3 months               | Nerve isolated, cuffed/sutured shut                                                         | No            | No              | No              | No                    | Zheng et al. (2014) [33]      |
| Larynx action potentials            | Efferent                           | Left         | Wistar              | 250-350g | 21 chronic       | Self-sizing silicone tube | 1 mm                | 8 weeks                      | Nerve isolated, cuffed                                                                      | Yes           | No              | No              | No                    | El Tahry et al. (2011) [35]   |
| Inflammation / Gastric Emptying     | Efferent                           | Left         | Sprague-Dawley      | 190-300g | 53               | Silicone tube             | 0.75 mm             | 13-71 days                   | Nerve isolated, cuffed                                                                      | Yes           | Yes             | Yes             | Yes (Plasma)          | Somann et al (2017)*          |

*\*This study included for comparison purposes*

## Supplemental Table 4

### Stimulation Details of 17 Previous Studies Using Chronic Vagus Nerve Cuffing

| Stimulation Parameters |                        |                | Stimulation Protocols           |                                               |                                                                                                             | Additional Stimulation Details                                       |                                                    | Reference                     |
|------------------------|------------------------|----------------|---------------------------------|-----------------------------------------------|-------------------------------------------------------------------------------------------------------------|----------------------------------------------------------------------|----------------------------------------------------|-------------------------------|
| Amplitude              | Pulse Width ( $\mu$ s) | Frequency (Hz) | Pulse Details                   | Stimulation Duration                          | Stimulation Timeline                                                                                        | Delivery Mechanism                                                   | Stimulation Verification                           | Author                        |
| 1 mA                   | 500                    | 20             | Square-wave pulses              | 15 minute continuous pulse train              | Half stimulated after 2 days, the remainder after 4 days                                                    | -                                                                    | -                                                  | Krahl et al. (2001) [22]      |
| 0.25 mA                | 500                    | 20             | -                               | 30 sec on, 5 min off, continuous              | 1 hour, 1 day, 3 day, 2-week, 3-week, & 3-month VNS groups                                                  | Implanted Cyberonics 102 Pulse Stimulator                            | Lead impedance check, no functional test presented | Dorr et al. (2006) [23]       |
| 0.5 mA                 | 500                    | 20             | Balanced biphasic               | 5 min continuous pulse train                  | 4+ day recovery, then 5 consecutive 20 min treatments (5 min baseline, 5 min acute VNS, 10 min post period) | A-M Systems Model 2100 stimulator, tethered to headcap               | -                                                  | Handforth et al. (2001) [24]  |
| 1.5 mA                 | 500                    | 30             | -                               | 30 sec on, 5 min off, continuous              | 2 day recovery, then 3 hour or 1 month VNS                                                                  | Implanted Cyberonics stimulator                                      | -                                                  | Biggio et al. (2009) [25]     |
| 0.5 - 0.75 mA          | 500                    | 20             | -                               | 14 sec on, 48 sec off, continuous             | 1 week recovery, then 12 week VNS                                                                           | Implanted Cyberonics Demipulse stimulator                            | -                                                  | Chunichai et al. (2016) [26]  |
| 0.25 mA                | 250                    | 20             | -                               | 30 sec per 5 min, continuous                  | 1 week recovery, then 2 hour or 3 week VNS                                                                  | Implanted Cyberonics stimulator                                      | -                                                  | Cunningham et al. (2008) [15] |
| 0.25, 0.5, or 1 mA     | 250                    | 30             | -                               | 7 sec on, 18 sec off, continuous              | 1 week recovery, 5 week baseline, then 2 week VNS                                                           | Stimulator tethered to headcap                                       | Daily impedance test with 1mA square wave          | Grimonprez et al. (2015) [27] |
| 1.5 mA                 | 500                    | 30             | -                               | 30 sec on, 5 min off, continuous              | 2 day recovery, then 3 hour or 4 week VNS                                                                   | Implanted Cyberonics Demipulse Model 103 stimulator                  | Dedicated test pre-implant                         | Banni et al. (2012) [72]      |
| 0.04 or 0.4 mA         | 500                    | 1              | -                               | 30 seconds acute VNS pre or post conditioning | 5 day recovery, pre-condition day, then 3 consecutive conditioning days                                     | A-M Systems Model 2100 stimulator, tethered through neck incision    | Respiration and behavioral response to VNS         | Zhang et al. (2013) [28]      |
| 0.4 mA                 | 500                    | 30             | -                               | 30 seconds                                    | 1 week recovery, then 5 conditioning/ treatment days (acute VNS on day 4)                                   | Tucker Davis Tech. MS4 stimulator, tethered to headcap               | Respiration response to 0.2 mA, 60 Hz, 10 sec VNS  | Pena et al. (2014) [29]       |
| 0.2, 0.4, or 0.8 mA    | 500                    | 20             | Biphasic pulses                 | 30 seconds                                    | 2 day recovery, then condition testing with acute VNS                                                       | Undefined stimulator, tethered through neck incision                 | Action potentials recorded                         | Clark et al. (1998) [14]      |
| 1 mA                   | 500                    | 5              | -                               | 10 sec on, 90 sec off, continuous             | 12 day recovery, then 3 hour VNS per day (5 days)                                                           | Grass Technologies stimulator chain, tethered through head connector | -                                                  | Meregnani et al. (2011) [34]  |
| 0.05 - 0.25 mA         | 200                    | 20             | -                               | 10 sec on, 50 sec off, continuous             | 7 day recovery, then 6 week VNS                                                                             | Undefined pulse generator and connection.                            | Respiration and heart rate response                | Agarwal et al. (2016) [30]    |
| 3 V                    | 1000                   | 5              | Charge balanced                 | 1 hour on, 1 hour off, continuous             | 3-4 day recovery, then 4 week VNS                                                                           | Implanted Harald Stauss Scientific Model RNS stimulator              | Heart rate and blood pressure response             | Chapleau et al. (2016) [31]   |
| 1 mA                   | 500                    | 20             | -                               | 7 sec on, 66 sec off, continuous              | 10 week VNS                                                                                                 | Implanted Cyberonics Demipulse Model 103 stimulator                  | -                                                  | Lee et al. (2016) [32]        |
| 0.1 - 1 mA             | 200                    | 20             | Rectangular pulses              | Various, intermittent                         | 6 weeks intermittent VNS                                                                                    | Implanted Unimec ISE1000SA pulse generator                           | Heart rate and artery pressure                     | Zheng et al. (2014) [33]      |
| 0.04 - 0.8 mA          | 500                    | -              | Block-pulses                    | Various to determine dose response curves     | 5 days / week, for 8 weeks                                                                                  | Undefined stimulator tethered to headcap                             | Action potentials recorded                         | El Tahry et al. (2011) [35]   |
| Various (1 mA typical) | Various (1 ms typical) | 5              | Balanced biphasic square pulses | 5 - 10 min pre-calibration, 5 min treatment   | 13 - 71 day recovery, then pre-calibration VNS 30 min before, acute VNS 30 min after endotoxin              | Bionode, fully implanted or tethered to headcap                      | Direct recording, separate recording cuff          | Somann et al (2017)*          |

*\*This study included for comparison purpose*

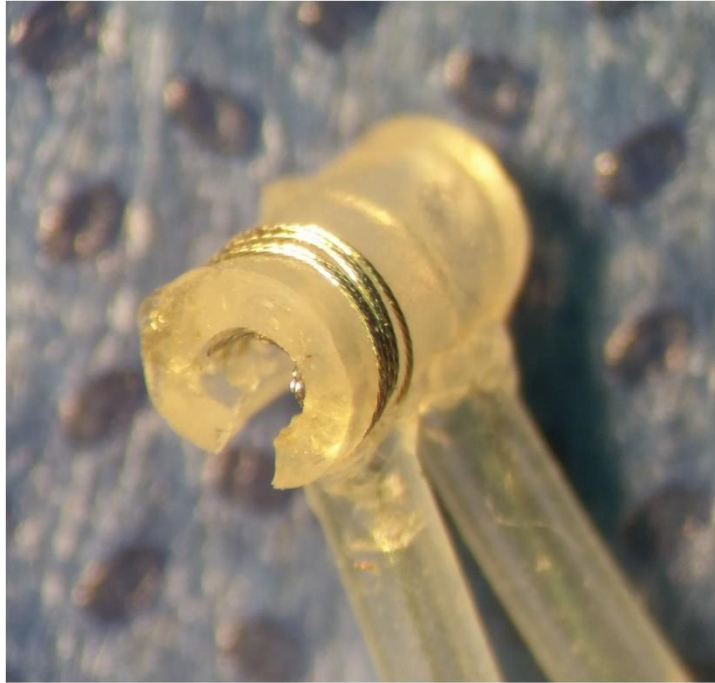

**Supplemental Figure 1.** Photograph showing a standard stimulation cuff used in our studies. Threaded wire electrode was used as a grounding reference for stimulation and oriented cranially.

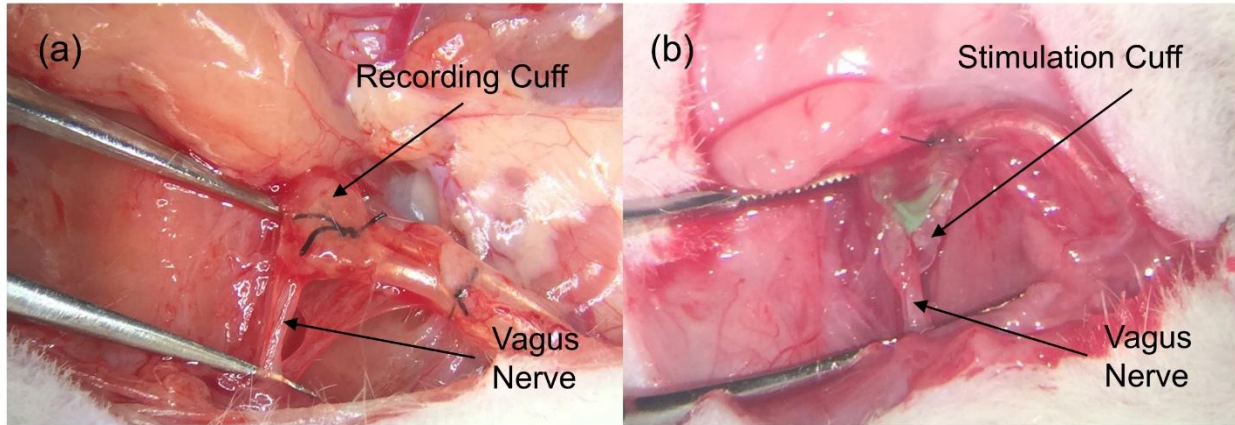

**Supplemental Figure 2.** Pre-perfusion visual inspection of two animals, both showing cuffs in correct location with vagus nerve intact. (a) From a rat that demonstrated complete suppression of Fluorogold transport (eRx71), while (b) demonstrated a limited but present transport (eRx103).

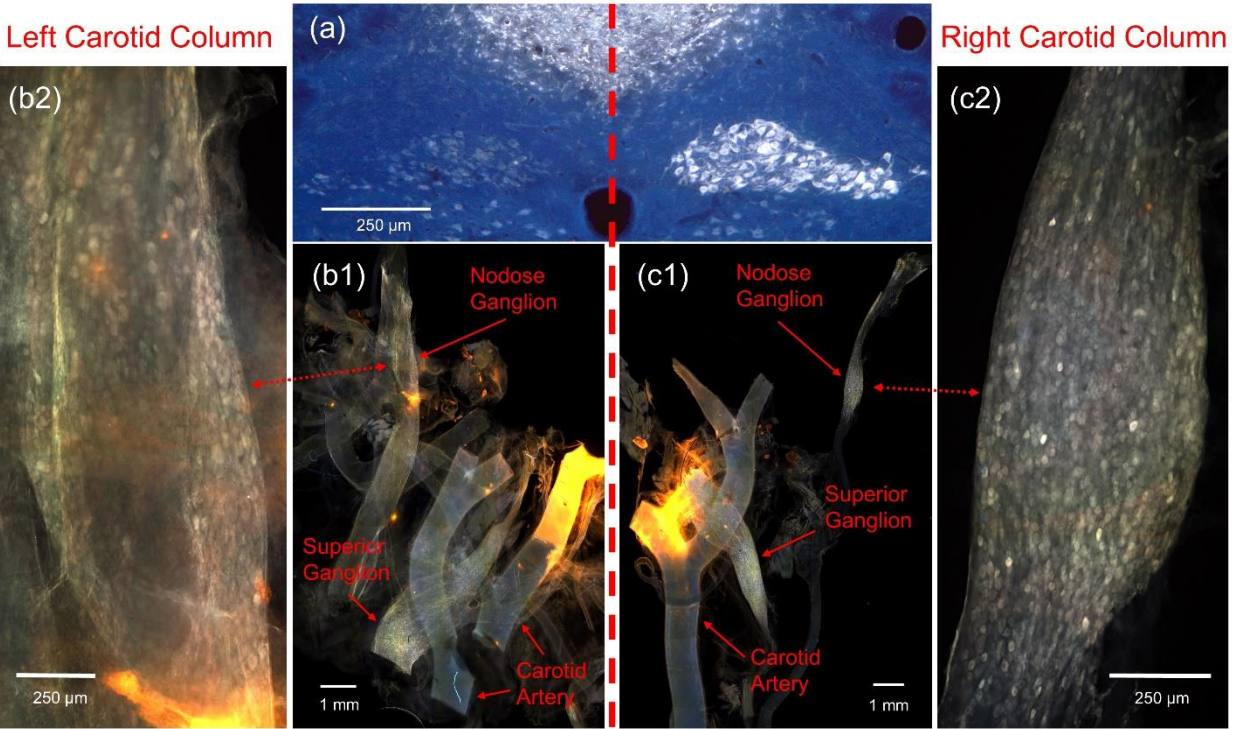

**Supplemental Figure 3.** Representative fluorescence images and image mosaics of a single rat (eRx144). **(a)** medulla image showing clear efferent fiber FG transport on the right side of the dorsal motor nucleus, and complete suppression of transport on the left side. **(b1)** tissue dissected cranial to stimulation cuff on left vagus nerve, with enhanced image of nodose ganglia **(b2)** showing FG illumination. **(c1)** cervical column of right vagus nerve and surrounding tissue, with enhanced image of nodose ganglia **(c2)** showing FG illumination. Vagus nodose ganglia from each side show similar size, shape, location, and textural illumination, indicating active afferent fiber transport in both despite a complete suppression of efferent fiber transport in the cuffed left vagus. Note that the bright yellow and orange illumination on the upper edge of the carotid artery is from ink residue used to mark the samples during explant and has no bearing on FG illumination.

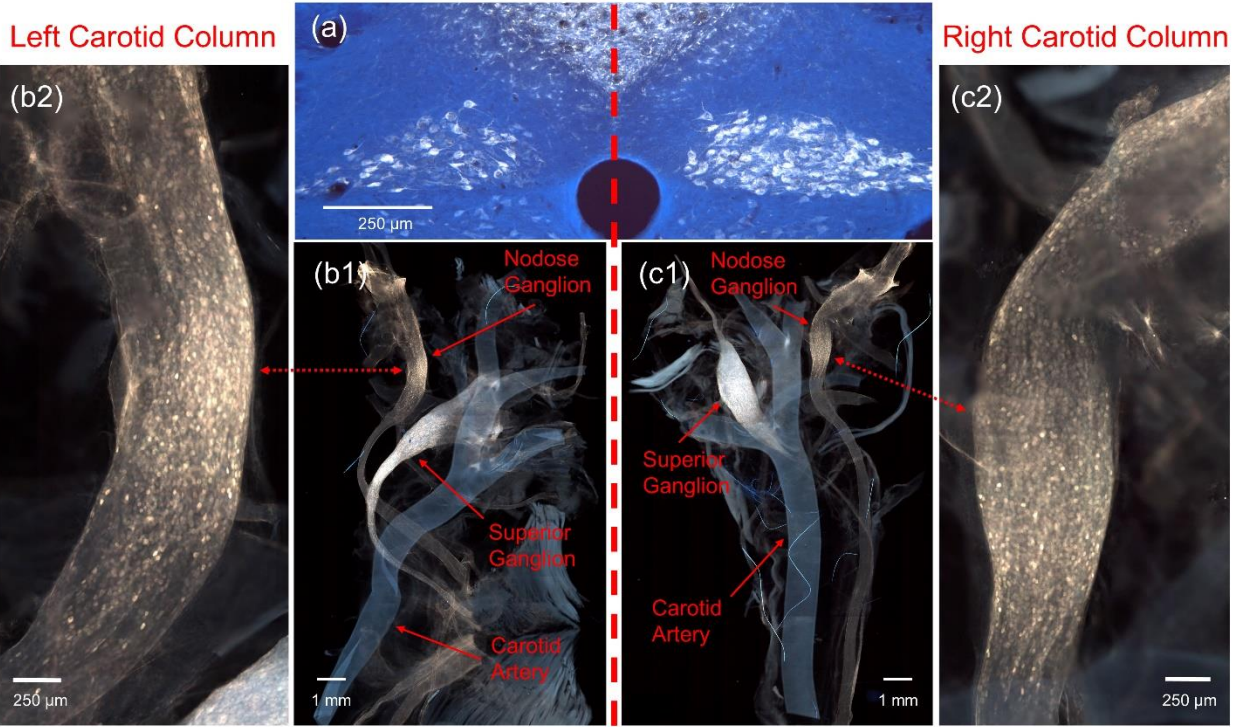

**Supplemental Figure 4.** Representative fluorescence images and image mosaics of a single rat (eRx162). **(a)** medulla image showing clear efferent fiber FG transport on the right side of the dorsal motor nucleus, and significant suppression of transport on the left side. **(b1)** cervical column dissected cranial to stimulation cuff on left vagus nerve, with enhanced image of nodose ganglia **(b2)** showing FG illumination. **(c1)** cervical column of right vagus nerve and surrounding tissue, with enhanced image of nodose ganglia **(c2)** showing FG illumination. Vagus nodose ganglia from each side show similar size, shape, location, and textural illumination, indicating similar active afferent fiber transport in both despite a suppression of efferent fiber transport in the cuffed left vagus.



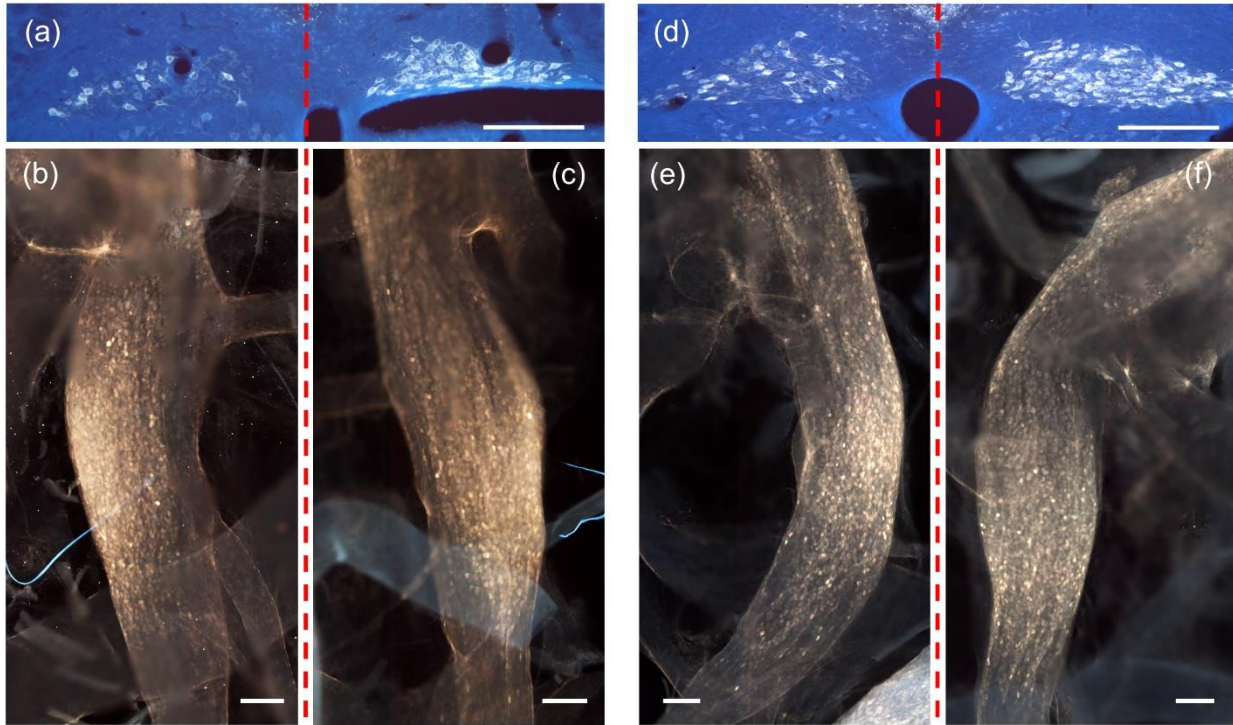

**Supplemental Figure 5.** Comparative fluorescence images of two separate rats demonstrating healthy FG transport through efferent fibers to the DMN and afferent fibers to the nodose in uncuffed right vagus nerves, but only through afferent fibers in cuffed left vagus nerves. (a) medulla image (from eRx160) showing clear efferent fiber FG illumination on the right side of the dorsal motor nucleus, and severe suppression of FG on the left side. (b & c) corresponding fluorescence nodose images of the cuffed left and uncuffed right (respectively) vagus nerves (from eRx160). (d) medulla image (from eRx162) also showing strong efferent fiber FG illumination on the right side of the dorsal motor nucleus, and significant suppression of FG on the left side. (e & f) corresponding fluorescence nodose images of the cuffed left and uncuffed right (respectively) vagus nerves (from eRx162). Red dashed lines separate the left vagal effects from right vagal effects. Scale bars = 250 microns.

### Supplemental methods for hematoxylin and eosin histology

For paraffin processing, nerve tissue was processed in a Sakura VIP6 Tissue Processor. The protocol timing used is shown in Supplemental Table 4. All solutions were used under vacuum pressure and at room temperature, except the paraffin which was infiltrated at 61° C. The tissue was then embedded in Leica Paraplast Plus paraffin and cut on a Leica FinesseME microtome at a thickness of 4 micrometers. Slides were dried in a 60° C oven for an hour and stained in a Shandon Varistain autostainer with Gill's Hematoxylin (3 min.) and Eosin Y/Phloxine B (30 sec.). Stained sections were dehydrated through graded alcohols, cleared in xylene, and coverslipped.

For plastic processing, cuffed nerve tissue was processed in a Leica TP1020 processor using the protocol timing in Supplemental Table 4. All stations, except the Acetone, were used under vacuum. The last two changes of PMMA were done by hand in a glass desiccator under vacuum. All Methyl-MethAcrylate (MMA) changes were a solution of 95% MMA (Fisher Scientific) and 5% Dibutyl Phthalate (Fisher Scientific). The cuffed nerve samples were embedded in prepolymerized molds using a solution of 95% MMA and 5% dibutyl phthalate. 0.25% Perkadox16 was used as an initiator for polymerization. The molds were then left at room temperature for a week to polymerize. After the blocks were fully polymerized, they were put in a 60° C oven for an hour to complete polymerization and evaporate any remaining MMA. The PMMA blocks were then trimmed with a Mar-med band saw and mounted on plastic blocks for sectioning in a Reichert-Jung Polycut S. Sections were taken from the PMMA blocks at a thickness of 4-5 micrometers and mounted on APES (Sigma Aldrich) coated slides. The slides were compressed in a metal press and left in a 60° C oven overnight. The slides were then de-plasticized in three changes of acetone for 10 minutes each, hydrated and stained in a Shandon Varistain autostainer with Gill's Hematoxylin (5 min) and Eosin Y/Phloxine B (2 min.). Stained sections were dehydrated and coverslipped as the paraffin sections.

### Supplemental Table 4

Protocol timing used in paraffin tissue and cuff, and PMMA and cuff sample processing.

| Paraffin Processing |              |            | PMMA Processing |                   |            |
|---------------------|--------------|------------|-----------------|-------------------|------------|
| Station             | Solution     | Time (min) | Station         | Solution          | Time (hrs) |
| 1                   | 10% NBF      | 0:00       | 1               | 70% ETOH          | 1          |
| 2                   | 70% ETOH     | 0:05       | 2               | 95% ETOH          | 1          |
| 3                   | 80% ETOH     | 0:05       | 3               | 95% ETOH          | 1          |
| 4                   | 95% ETOH     | 0:05       | 4               | 100% ETOH         | 2          |
| 5                   | 95% ETOH     | 0:05       | 5               | 100% ETOH         | 2          |
| 6                   | 100% ETOH    | 0:05       | 6               | 100% ETOH         | 3          |
| 7                   | 100% ETOH    | 0:05       | 7               | Acetone           | 2          |
| 8                   | 100% ETOH    | 0:10       | 8               | Acetone           | 2          |
| 9                   | XYLENE       | 0:05       | 9               | MMA 1             | 12         |
| 10                  | XYLENE       | 0:10       | 10              | MMA 2             | 12         |
| 11                  | PARAFFIN     | 0:05       | 11              | MMA 3             | 12         |
| 12                  | PARAFFIN     | 0:05       | 12              | MMA 4             | 24         |
| 13                  | PARAFFIN     | 0:05       |                 | Total Time (days) | 74         |
| 14                  | PARAFFIN     | 0:05       |                 |                   |            |
|                     | Process Time | 1:15       |                 |                   |            |
|                     | Total Time   | 2:15       |                 |                   |            |
